# Supplementary material
Source: Research Square preprint supplement (doi:10.21203/rs.3.rs-9453408/v1)
Supplement: Supplementary file 1 [file 039fdb69196fba17d1841edd.pdf]

Insulin-like growth factor 1 (IGF1) overexpression on a phycocyanin carrier protein in cyanobacteria

Bharat Kumar Majhi and Anastasios Melis\*

Department of Plant and Microbial Biology, 111 Koshland Hall, MC-3102, University of California, Berkeley, CA 94720-3102, USA

## SUPPLEMENTARY INFORMATION

\*Correspondence: [melis@berkeley.edu](mailto:melis@berkeley.edu)

# Nucleotide and Protein Sequences

## 1. *cpcB\*6xHis\*S\*tev\*IGF1*

### Sequence for 5'- homologous recombination

UPPER CASE

**UPPER CASE BOLD**

UPPER CASE UNDERLINE

**LOWER CASE BOLD**

***UPPER CASE BOLD ITALICS***

UPPER CASE UNDERLINE

**LOWER CASE BOLD**

***UPPER CASE UNDERLINE ITALICS***

- *cpcB* (without stop codon)

- His-tag

- Spacer (PAEKWAPGGS)

- *tev* cleavage sequence (ENLYFQG)

- codon-optimized IGF1 gene with stop codon

- intergenic sequence

- *CmR* (chloramphenicol selection cassette)

- Transcription terminator

### Sequence for 3'- homologous recombination

***LOWER CASE BOLD ITALICS***

***LOWER CASE UNDERLINE ITALICS***

- *cpcB-cpcA* intergenic sequence

- *cpcA* (partial)

ATGTTGACGTATTCACTCGGGTTGTTCCCAAGCTGATGCTCGCGGCGAGTACCTCTCTGTTCTCAGTTAGATGCTTTGA  
GCGCTACCGTTGCTGAAGGCAACAAACGGATTGATTCTGTTAACCGCATCACCGTAATGCTCCGCTATCGTTCCAAACG  
CTGCTCGTGCTTTGTTGCGCCGAACAGCCCAATTAATCCAACCCGGTGAAACGCTACACCAGCCGTCGTATGGCTGCT  
GTTTGCCTGACATGGAATCATCCTCCGCTATGTTACCTACGCAACCTTACCAGGCGACGCTCCGTTCTAGAAGATCGTT  
GCTTGAACGGTCTCCGTGAAACCTACGTTGCCCTGGGTGTTCCCGGTGCTCCGTAGCTGCTGGCGTTCAAAAAATGAAA  
GAAGCTGCCCTGGACATCGTTAACGATCCCAATGGCATCACCCGTGGTGATTGCAGTGCTATCGTTGCTGAAATCGCTGG  
TACTTCGACCGCGCGCTGCTGCCGTAGCC**ACCACCACCACCACCACC**CCCGCGAAAAATGGGCCCGCGGCTCCga  
**aaacctgtattttcagggcACCCTCTGTGGGGCTGAGCTAGTGGATGCGCTGCAGTTTGTGGCGATCGCGGCTTCTACTTC**  
**AACAAACCACTGGCTATGGCAGTTCTCCCGCGGGCGCCCAACGGGCATCGTGGAATGCTGCTTTCGCACT**  
**GCGATCTGCGCGCTTGAAATGTA****CTGCGCTCCTCTCAAGCCAGCCAAATCCGCTTAA**TGATAACGGGAAGCCCTGGG  
**CCAACCTTTGGCGAAAAATGAGACGTTGATCGGCACGTAAGAGGTTCCAACCTTACCATAATGAAATAAGATCACTACC**  
**GGGCGTATTTTTGAGTTATCGAGATTTTCAGGAGCTAAGGAAGCTAAA**atggagaaaaaatcactggatataaccaccgtgat  
atcccaatggcatgtaaagaacattttgaggcatttcagtcagttgctcaatgtacctataaccagaccgttcagctggatattacggccttttaagaccgt  
aaagaaaaataagcacaagttttatccggcctttattcacattctgcccgcctgatgaatgctcatccggaattccgatggcaatgaagacggtgagctg  
gtgatatgggatagttacccttgttacaccgttttccatgagcaaacgaaacgttttcatcgcctctggagtgaataccacgacgatttccggcagtttcta  
cacatatattcgaagatgtggcgtgttacggtgaaaacctggcctatttccctaaaggtttattgagaatatttttctcagccaatccctgggtgagtt  
tcaccagttttgatttaacgtggccaatattgacaacttcttccccgcttttaccatgggcaaatattatcgaaggcgacaaggtgctgatccgctg  
gcgattcaggttcatcatgcccgtttgtgatgcttccatgctggcagaatgcttaataaataacagttactgcatgagtgaggcggggcgtaaTTTT  
TTTAAGGCAGTTATTGGTGCCCTAAACGCCTGGTGCTACGCCTGAATAAGTGATAAtctggttattttaaaaaccaactttactcag  
gttccatacccgagaaaaatccagcttaaaagctgacatatctaggaaaaattttcacatttcaacgggagataaccagaacaatqaaaaccctttaactg  
aaqccgtttccaccqctgactctcaaggtcgttttctgaqcaqaccqaattqcaaatqctttcagtcgtctacgtcaagctaatqctggtttqcaagccg  
taaaqctctqaccqacaatqccaqagcttqtaaatqgtqctqccaagcgtttataacaattcccctacaccacccaacccaagqcaacaacttt

gtcgcggaatcaacgggataaaqacaagtgtgcccgagacatcggtactactccgcacgttacctactgcttaqgtgtagtgataccggtccttga  
tgaqtacttgatcgggtattgatgaaatcaaccgcacctttgacctctccccagctggtatgtt

### Protein Sequence

*UPPER CASE ITALICS* - *cpcB* (without stop codon)  
**UPPER CASE BOLD** - His-tag  
**UPPER CASE BOLD** - Spacer (PAEKWAPGGS)  
UPPER CASE UNDERLINE - tev cleavage sequence (ENLYFQG)  
**UPPER CASE BOLD ITALICS** - codon-optimized IGF1 gene with stop codon

MFDVFTRVVSQADARGEYLSGSQLDALSATVAEGNKRIDSVNRITGNASAIVSNAARALFAEQPQLIQPGGNAYTSRRMAACL  
RDMEILRYVYATFTGDASVLEDRLNGLRETYVALGVPASVAAGVQKMKEAALDIVNDPNGITRGDCSAIVAEIAGYFDRA  
AAAVAHHHHHH**PAEKWAPGGS**ENLYFQGTLCGAE**LV**DA**LQVCGDRGFYFNKPTGYGSSRRAPQTGIVDECCFRSCD**  
**LRRLEMYCAPLKPAKSA\***

## 2. *cpcB*\*6xHis\*tev\*IGF1

### Sequence for 5'- homologous recombination

*UPPER CASE* - *cpcB* (without stop codon)  
**UPPER CASE BOLD** - His-tag  
**LOWER CASE BOLD** - tev cleavage sequence (ENLYFQG)  
**UPPER CASE BOLD ITALICS** - codon-optimized IGF1 gene with stop codon  
UPPER CASE UNDERLINE - intergenic sequence  
**LOWER CASE BOLD** - *CmR* (chloramphenicol selection cassette)  
UPPER CASE UNDERLINE ITALICS - Transcription terminator

### Sequence for 3'- homologous recombination

**LOWER CASE BOLD ITALICS** - *cpcB-cpcA* intergenic sequence  
*LOWER CASE UNDERLINE ITALICS* - *cpcA* (partial)

ATGTTTCGACGTATTCACTCGGGTTGTTTCCCAAGCTGATGCTCGCGGCGAGTACCTCTCTGGTTCTCAGTTAGATGCTTTGA  
GCGCTACCGTTGCTGAAGGCAACAAACGGATTGATTCTGTTAACCGCATCACCGGTAATGCTCCGCTATCGTTTCCAAACG  
CTGCTCGTGCTTTGTCGCCGAACAGCCCCAATTAATCCAACCCGGTGAAACGCCTACACCAGCCGTCGTATGGCTGCTT  
GTTTGCCTGACATGGAATCATCCTCCGCTATGTTACCTACGCAACCTTACCGGCGACGCTCCGTTCTAGAAGATCGTT  
GCTTGAACGGTCTCCGTGAAACCTACGTTGCCCTGGGTGTTCCCGGTGCTCCGTAGCTGCTGGCGTTCAAAAAATGAAA  
GAAGCTGCCCTGGACATCGTTAACGATCCCAATGGCATCACCCGTGGTGATTGCAGTGCTATCGTTGCTGAAATCGCTGG  
TACTTCGACCGCGCCGCTGCTGCCGTAGCC**CACCACCACCACCACC**gaaaacctgtat**tttcaggggACCCTCTGTGGGGCT**  
**GAGTAGTGGATGCGCTGCAGTTTGTGGCGATCGCGGCTTCTACTTCAACAAACCACTGGGCTATGGCAGTTCTTC**  
**CCGGCGGGCGCCCAACGGGCATCGTGGATGAATGCTGCTTTCGAGCTGCGATCTGCGCCGCTTGAAATGTACTGC**  
**GCTCCTCTAAGCCAGCCAAATCCGCTTAA**TGATACCGGGAAGCCCTGGGCCAACTTTTGGCGAAAATGAGACGTTGAT  
CGGCACGTAAGAGGTTCCAACCTTACCATAATGAAATAAGATCACTACCGGGCGTATTTTTGAGTTATCGAGATTTTC

**AGGAGCTAAGGAAGCTAAA**atggagaaaaaatcactggatataccaccgttgatataccaatggcatgtaaagaacattttgaggcatttca  
 gtcagttgctcaatgtacctataaccagaccgttcagctggatattacggccttttaagaccgtaaagaaaaataagcacaagttttatccggcctttattc  
 acattcttccccctgatgaatgctcatccggaattccgatggcaatgaaagacggtagctgggatagttcaccctgttacaccgttttcc  
 atgagcaaacgaaacgttttcacgctctggagtgaataccacgacgattccggcagtttctacacatatattcgcaagatgtggcgtgttacggtgaaaaac  
 ctggcctatttccctaaagggttttatgagaatatttttctcctcagccaatccctgggtgagtttaccagttttgattaaacgtggccaatattgacaact  
 tcttcgccccgttttaccatgggcaaatattatacgaaggcacaaggtgctgatccgctggcgattcaggttcatcatcgctttgtgatggcttccatg  
 tcggcagaatgcttaataatgacaacagtagctgcatgagtgaggcagggcgggcgtaa **TTTTTTAAGGCAGTTATTGGTGCCTTAAACGC**  
**CTGGTGCTACGCCTGAATAAGTGATAA**tctggttattttaaaccactttactcaggttccatacccagaaaaatccagcttaagctgac  
 atatctaggaaaaattttcacattctaaccgggagataccagaaca atgaaaccctttaaactgaaqccgtttccaccqctgactctcaaggtcgttttctg  
aqcaqaccqaattqcaaatgctttcggtcgtctacqcaagtaaatgctggttqcaaaccqctaaagctctqaccqacaatqcccaqagcttqgtaaa  
tqgtqctqcccaagcgtttatacaaatccctacaccaccaaaccaagqcaacaactttgctqcgatcaacqaggtaaagacaagtqgcccq  
ggacatcagctactacccqcatcgttacctactgctggtggtaccggtcctttgagatgagtagctgacccqgtattgagaaatcaaccgq  
accttgacctctccccagctggtatgtt

**Protein Sequence**

|                                       |                                             |
|---------------------------------------|---------------------------------------------|
| <i>UPPER CASE ITALICS</i>             | - <i>cpcB</i> (without stop codon)          |
| <b>UPPER CASE BOLD</b>                | - His-tag                                   |
| <u>UPPER CASE UNDERLINE</u>           | - tev cleavage sequence (ENLYFQG)           |
| <b><i>UPPER CASE BOLD ITALICS</i></b> | - codon-optimized IGF1 gene with stop codon |

MFDVFTRVVSQADARGEYLSGSQLDALSATVAEGNKRIDSVNRITGNASAIVSNAARALFAEQPQLIQPGGNAYTSRRMAACL  
 RDMEILRYVYATFTGDASVLEDRCLNGLRETYVALGVPGASVAAGVQKMKEAALDIVNDPNGITRGDCSAIVAEIAGYFDRA  
 AA~~AV~~AHHHHHHHENLYFQGTLCGAELVDALQVCGDRGFYFNKPTGYGSSRRAPQTGIVDECCFRSCDLRRLEMYCAPLKP  
 AKSA\*

**3. *cpcB*\*S\*6xHis\*hrv\*IGF1**

**Sequence for 5'- homologous recombination**

|                                                   |                                                     |
|---------------------------------------------------|-----------------------------------------------------|
| <i>UPPER CASE</i>                                 | - <i>cpcB</i> (without stop codon)                  |
| <u>UPPER CASE UNDERLINE</u>                       | - Spacer (PAEKWAPGGS)                               |
| <b>UPPER CASE BOLD</b>                            | - His-tag                                           |
| <b>LOWER CASE BOLD</b>                            | - <b>HRV3C cleavage sequence (LEVLFGQP)</b>         |
| <b><i>UPPER CASE BOLD ITALICS</i></b>             | - codon-optimized reverse IGF1 gene with stop codon |
| <u>UPPER CASE UNDERLINE</u>                       | - intergenic sequence                               |
| <b>LOWER CASE BOLD</b>                            | - <i>CmR</i> (chloramphenicol selection cassette)   |
| <u><b><i>UPPER CASE UNDERLINE ITALICS</i></b></u> | - Transcription terminator                          |

**Sequence for 3'- homologous recombination**

|                                            |                                        |
|--------------------------------------------|----------------------------------------|
| <b><i>LOWER CASE BOLD ITALICS</i></b>      | - <i>cpcB-cpcA</i> intergenic sequence |
| <b><i>LOWER CASE UNDERLINE ITALICS</i></b> | - <i>cpcA</i> (partial)                |

ATGTTGACGTATTCACTCGGGTTGTTCCCAAGCTGATGCTCGCGGCGAGTACCTCTCTGGTTCTCAGTTAGATGCTTTGA  
 GCGCTACCGTTGCTGAAGGCAACAAACGGATTGATTCTGTTAACCGCATCACCGGTAATGCTTCCGCTATCGTTCCAACG  
 CTGCTCGTGCTTTGTTGCGCCGAACAGCCCAATTAATCCAACCCGGTGAAACGCCTACACCAGCCGTCGTATGGCTGCTT  
 GTTTGCCTGACATGGAAATCATCCTCCGCTATGTTACCTACGCAACCTTACCAGGCGACGCTTCCGTTCTAGAAGATCGTT  
 GCTTGAACGGTCTCCGTGAAACCTACGTTGCCCTGGGTGTTCCCGGTGCTCCGCTAGCTGCTGGCGTTCAAAAAATGAAA  
 GAAGCTGCCCTGGACATCGTTAACGATCCCAATGGCATCACCCGTGGTGATTGCAGTGCTATCGTTGCTGAAATCGCTGG  
 TTACTTCGACCGCGCCGCTGCTGCCGTAGCCCCCGCCGAAAAATGGGCGCGGGCGGCTCC**CACCACCACCACCACC****Cct**  
**tgaggtactcttccagggtccg****GCCAGTAAGGCCCGAAATTACCAGCTTGTATATGGAGTTGCGTCTAGATTGTTCCCGT**  
**TTCTGTTGCAAGATGTTATCGGTACGCAACCAGCTCGCCGATCTTCTAGTGGTTATGGGACGCCAAAAATTTCTACTTC**  
**GGACGCGATGGATGTGATTCCAACCTGGCTGATGTGCTCGAAGCGGGATGCTTGACCCGGCCAGGCTAA**TGATACCGG  
GAAGCCCTGGGCCAACTTTTGGCGAAAAATGAGACGTTGATCGGCACGTAAGAGGTTCCAACCTTTACCATAATGAAAT  
AAGATCACTACCGGGCGTATTTTTGAGTTATCGAGATTTTACAGGAGCTAAGGAAGCTAAA**atggagaaaaaatcactggat**  
**ataccaccgtgatataccaatggcatcgtaaagaacattttgaggcatttcagtcagttgctcaatgtacctataaccagaccgttcagctggatattacg**  
**gccttttaagaccgtaaagaaaaataagcacaagttttaccgctttattcacattctgccgctgatgaatgctcatccggaattccgtatggcaatg**  
**aaagacggtagctggtagatgggatagttcaccttggtaaccggtttccatgagcaactgaaacgtttcatcgctctggagtgaataccacgacga**  
**ttccggcagtttctacacatatattcgcaagatgtggcgtgttacggtgaaaacctggcctatttcctaaagggtttattgagaatatgttttcgtctcagcc**  
**aatccctgggtgagtttaccagtttgattaaacgtggccaatattggacaacttctcgccccgtttaccatgggcaaatattatacgaaggcga**  
**ggtgctgatgccgtggcattcaggttcacatgccgtttgtagtgcttcacatgctggcagaatgcttaataacagtaactgctgatgagtgccagg**  
**cgggggcgtaa**TTTTTTAAGGCAGTTATTGGTGCCCTTAAACGCCTGGTGTACGCCTGAATAAGTGATAA**ctgggtatttttaa**  
**aaccaactttactcaggttccatacccgagaaaaatccagcttaaaagctgacatatctaggaaaaattttcacatttcaacgggagataccagaaca**atg  
aaaaccctttaactgaaqccgtttccaccgctgactctcaaggtcgctttctgagcaqaccqaattgcaaatgctttcggctcctacatcaaaqtaatg  
ctggtttgcaagccgctaaagctctgaccgacaatgccagagcttgtaaatggtgctgccaagccgtttataacaaatcccctacaccacccaacc  
caaggcaacaactttgctcggatcaacgggtaaaagacaagtatgcccggacatcggctactactccqcatcgttactactgcttagttgctggtg  
gtaccgctccttggatgagtagctgacccggtattgatgaaatcaaccgacacctttgacctctcccccaqctggtatgtt

**Protein Sequence**

*UPPER CASE ITALICS*  
**UPPER CASE BOLD**  
**UPPER CASE BOLD**  
UPPER CASE UNDERLINE  
***UPPER CASE BOLD ITALICS***

- *cpcB* (without stop codon)
- **Spacer (PAEKWAPGGS)**
- **His-tag**
- **HRV3C cleavage sequence (LEVLFQGP)**
- **codon-optimized IGF1 gene with stop codon**

*MFDVFTRVVSQADARGEYLSGSQLDALSATVAEGNKRIDSVNRITGNASAIVSNAARALFAEQPLIQPGGNAYTSRRMAA*  
*CLRDMEILRYVYATFTGDASVLEDRCLNGLRETYVALGVPASVAAGVQKMKEAALDIVNDPNGITRGDCSAIVAEIAGYF*  
*DRAAAAVAPAEKWAPGGS***HHHHHH**LEVLFQGP**ASKAPKLPACYMELRRLCDSRFCCEDEVIGTQPARRSSSGYTPKNF**  
***YFGRDGCVFQLADVLEAGCLTRPG\****

#### 4. *cpcB\*6xHis\*hrv\*IGF1*

Sequence for 5'- homologous recombination

UPPER CASE

UPPER CASE BOLD

LOWER CASE BOLD

UPPER CASE BOLD ITALICS

UPPER CASE UNDERLINE

LOWER CASE BOLD

UPPER CASE UNDERLINE ITALICS

- *cpcB* (without stop codon)

- His-tag

- HRV3C cleavage sequence (LEVLFQGP)

- codon-optimized reverse IGF1 gene with stop codon

- intergenic sequence

- *CmR* (chloramphenicol selection cassette)

- Transcription terminator

Sequence for 3'- homologous recombination

LOWER CASE BOLD ITALICS

LOWER CASE UNDERLINE ITALICS

- *cpcB-cpcA* intergenic sequence

- *cpcA* (partial)

ATGTTGACGTATTCACTCGGGTTGTTTCCCAAGCTGATGCTCGCGGCGAGTACCTCTCTGGTTCTCAGTTAGATGCTTTGA  
GCGCTACCGTTGCTGAAGGCAACAAACGGATTGATTCTGTTAACCGCATCACCGGTAATGCTTCCGCTATCGTTTCCAACG  
CTGCTCGTGCTTTGTTGCGCGAACAGCCCAATTAATCCAACCCGGTGAAACGCCTACACCAGCCGTCGTATGGCTGCT  
GTTTGC GTGACATGGAATCATCCTCCGCTATGTTACCTACGCAACCTTACC GCGGACGCTTCCGTTCTAGAAGATCGTT  
GCTTGAACGGTCTCCGTGAAACCTACGTTGCCCTGGGTGTTCCCGGTGCTTCCGTAGCTGCTGGCGTTCAAAAAATGAAA  
GAAGCTGCCCTGGACATCGTTAACGATCCCAATGGCATCACCCGTGGTGATTGCAGTGCTATCGTTGCTGAAATCGCTGG  
TACTTCGACCGCGCCGCTGCTGCCGTAGCC**CACCACCACCACCACC**cttgaggtactcttcagggtccg**GCCAGTAAGGCC**  
**CGAAATTACCAGCTTGTATATGGAGTTGCGTCGTCTAGATTGTTCCGTTTCTGTTGCGAAGATGTTATCGGTACGCAA**  
**CCAGCTCGCGATCTTCTAGTGGTTATGGGACGCCAAAAATTTCTACTTCGGACGCGATGGATGTGTATTCCAAGTGGC**  
**TGATGTGCTCGAAGCGGGATGCTTGACCGGCCAGGCTAA**TGATACCGGGAAGCCCTGGGCCAACTTTTGGCGAAAAT  
GAGACGTTGATCGGCACGTAAGAGGTTCCAACCTTCCACATAATGAAATAAGATCACTACCGGGCGTATTTTTGAGTT  
ATCGAGATTTTCAGGAGCTAAGGAAGCTAAAatggagaaaaaatcactggatataaccaccgttgatataatccaatggcatcgtaaagaac  
atttgaggcatttcagtcagttgctcaatgtacctataaccagaccgttcagctggatattacggccttttaagaccgtaagaaaaataagcacaagtt  
tatccggcctttattcacattcttgccgcctgatgaatgctcatccggaattccgatggcaatgaaagacggtagctggatggtgatgtttcacct  
tgttacaccgttttccatgagcaaaactgaaacgttttcatcgctctggagtgaataaccagacgatttccggcagtttctacacatatattcgaagatgtggc  
tgttacggtgaaaacctggcctatttccctaaagggttattgagaatatgttttctgctcagccaatccctgggtgagtttaccagttttgattaaacgtgg  
ccaatatggacaacttcttcgccccgttttaccatgggcaaatattatacgcaaggcgacaaggctgctgatgccgtggcgattcaggttcatcatgccgtt  
gtgatggcttccatgtcggcagaatgcttaatgaattacaacagtactgcatgagtgccagggcgggcgtaa **TTTTTTAAGGCAGTTATTGGTG**  
**CCCTAAACGCCTGGTGCTACGCTGAATAAGTGATAA**ctggttatttttaaaaccaactttactcaggttccatacccgagaaaatccag  
cttaagctgacatatctaggaatatttcaatttaacgggagataccagaaca atgaaaaaccctttaaactgaaqccgtttccaccqctgactctca  
aggtcgtttctgagcaqaccqaattgcaaatgctttcgtctacgtcaagctaatgctggtttgcaagccqctaaagctgacccgacaatqccc  
gagcttgtaaatggtgctqccaaqccgtttatacaaatccccacaccaccaaaaccaagqcaacaactttgctgagatcaacqgggtaaaq  
caagtgtaccqggacatcgctactacctccgcatgtaacctactgcttagttgctggtggtaccggtcctttgagatgacttqatcqqgtattgt  
gaaatcaaccgacctttqacctctccccagctggtatgtt

## Protein Sequence

*UPPER CASE ITALICS*

**UPPER CASE**

**UPPER CASE UNDERLINE**

***UPPER CASE BOLD ITALICS***

- *cpcB* (without stop codon)

- **His-tag**

- **HRV3C cleavage sequence (LEVLFQGP)**

- **codon-optimized IGF1 gene with stop codon**

*MFDVFTRVVSQADARGEYLSGSQLDALSATVAEGNKRIDSVNRITGNASAIVSNAARALFAEQPQLIQGGNAYTSRRMAA  
CLRDMEILRYVTYATFTGDASVLEDRCLNGLRETYVALGVPGASVAAGVQKMKEAALDIVNDPNGITRGDCSAIVAEIAGYF  
DRAAAVAHHHHH**LEVLFQGP**ASKAPKLPACYMELRRLCDSRFCCEDVIGTQPARRSSSGYGTPKNFYFGRDGCVFQLAD  
VLEAGCLTRPG\**
